# Supplementary material
Source: PubMed Central journal article supplement (PMC5833990)
Supplement: NIHMS889917-supplement.pdf [file NIHMS889917-supplement.pdf]

**Appendix**  
**Psychological Well-being's Link With Cardiovascular Health in Older Adults**  
**Boehm et al.**

**Appendix Figure 1.** Mean favorable cardiovascular health score across time.

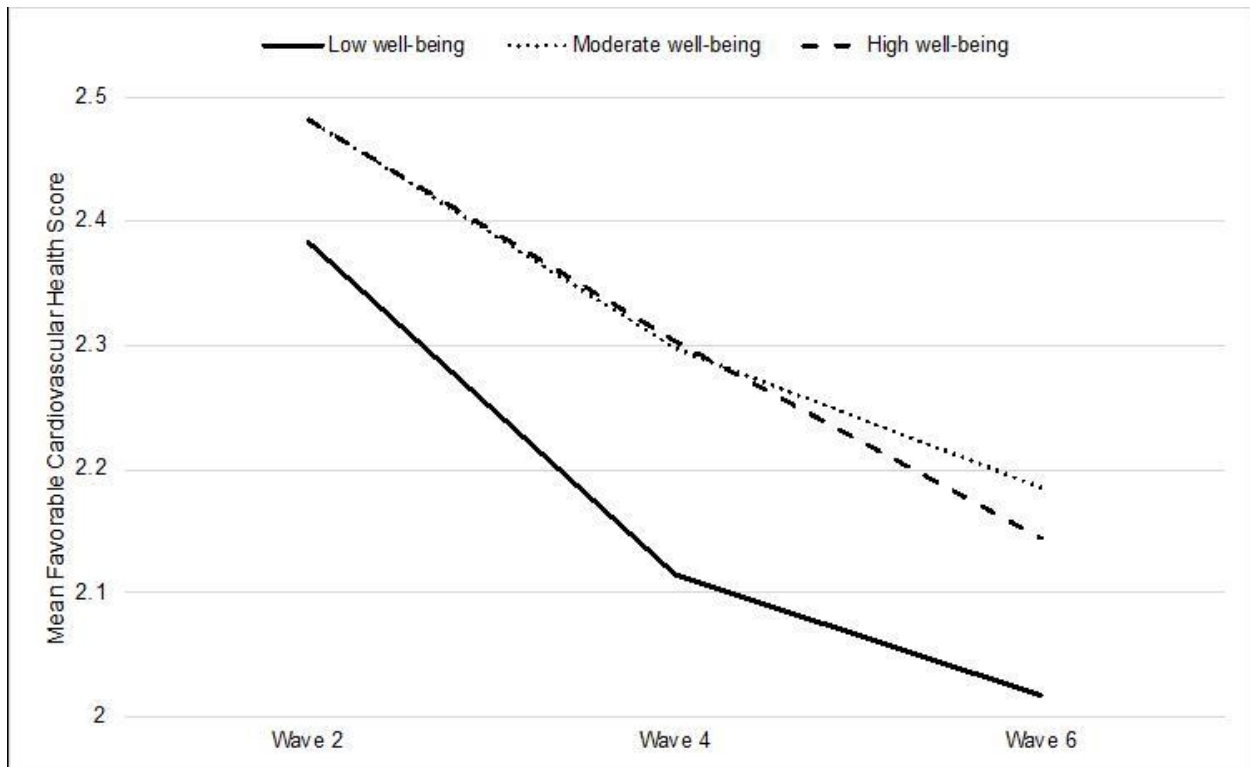

**Appendix**  
**Psychological Well-being's Link With Cardiovascular Health in Older Adults**  
**Boehm et al.**

**Appendix Table 1.** FCH Scores at Each Wave Where Higher Scores Indicate Better Health

| <b>FCH score</b> | <b>Each FCH score at<br/>Wave 2<br/>N (%)</b> | <b>Each FCH score at<br/>Wave 4<br/>N (%)</b> | <b>Each FCH score at<br/>Wave 6<br/>N (%)</b> |
|------------------|-----------------------------------------------|-----------------------------------------------|-----------------------------------------------|
| 0                | 10 (0.25)                                     | 239 (7.84)                                    | 345 (12.8)                                    |
| 1                | 291 (7.40)                                    | 254 (8.34)                                    | 190 (7.02)                                    |
| 2                | 2,029 (51.6)                                  | 1,384 (45.4)                                  | 1,224 (45.2)                                  |
| 3                | 1,178 (29.9)                                  | 894 (29.3)                                    | 714 (26.4)                                    |
| 4                | 378 (9.61)                                    | 250 (8.20)                                    | 210 (7.76)                                    |
| 5                | 48 (1.22)                                     | 26 (0.85)                                     | 23 (0.85)                                     |
| Missing FCH      | 991                                           | 1,878                                         | 2,219                                         |

*Note.* N=4,925.

FCH, favorable cardiovascular health.

**Appendix**  
**Psychological Well-being's Link With Cardiovascular Health in Older Adults**  
**Boehm et al.**

**Appendix Table 2.** Change in FCH Scores Over Time

| Change in FCH scores      | Each change in FCH from Wave 2 to Wave 4<br>N (%) | Each change in FCH from Wave 4 to Wave 6<br>N (%) | Each change in FCH from Wave 2 to Wave 6<br>N (%) |
|---------------------------|---------------------------------------------------|---------------------------------------------------|---------------------------------------------------|
| <b>Declined over time</b> |                                                   |                                                   |                                                   |
| -5                        | 1 (0.04)                                          | 1 (0.05)                                          | 2 (0.10)                                          |
| -4                        | 5 (0.22)                                          | 8 (0.40)                                          | 8 (0.39)                                          |
| -3                        | 43 (1.88)                                         | 28 (1.39)                                         | 79 (3.85)                                         |
| -2                        | 106 (4.65)                                        | 73 (3.62)                                         | 158 (7.70)                                        |
| -1                        | 387 (17.0)                                        | 287 (14.2)                                        | 337 (16.4)                                        |
| <b>Stayed the same</b>    |                                                   |                                                   |                                                   |
| 0                         | 1,409 (61.7)                                      | 1,339 (66.3)                                      | 1,155 (56.3)                                      |
| <b>Improved over time</b> |                                                   |                                                   |                                                   |
| 1                         | 302 (13.2)                                        | 263 (13.0)                                        | 293 (14.3)                                        |
| 2                         | 28 (1.23)                                         | 20 (0.99)                                         | 16 (0.78)                                         |
| 3                         | 1 (0.04)                                          | 0 (0.0)                                           | 3 (0.15)                                          |

*Notes:* N=4,925.

FCH, favorable cardiovascular health.

**Appendix Table 3.** Psychological Well-being's Association With the Individual Components of FCH

| Component                           | OR (95% CI)              |                          |                          |
|-------------------------------------|--------------------------|--------------------------|--------------------------|
|                                     | Model 1 <sup>a</sup>     | Model 2 <sup>b</sup>     | Model 3 <sup>c</sup>     |
| Favorable blood pressure (N=5,657)  | <b>1.08 (1.01, 1.16)</b> | 1.05 (0.98, 1.13)        | 1.05 (0.98, 1.13)        |
| Favorable cholesterol (N=5,172)     | 1.00 (0.93, 1.07)        | 1.00 (0.93, 1.07)        | 1.00 (0.93, 1.07)        |
| Favorable BMI (N=5,745)             | 1.02 (0.96, 1.08)        | 0.99 (0.94, 1.05)        | 0.99 (0.93, 1.05)        |
| Favorable diabetes status (N=6,277) | <b>1.29 (1.18, 1.41)</b> | <b>1.26 (1.15, 1.38)</b> | <b>1.25 (1.14, 1.37)</b> |
| Favorable smoking status (N=6,277)  | <b>1.44 (1.34, 1.55)</b> | <b>1.32 (1.22, 1.42)</b> | <b>1.32 (1.22, 1.43)</b> |

*Notes:* Boldface indicates statistical significance ( $p < 0.05$ ).

<sup>a</sup>Logistic regression models adjusted for age, gender, and race.

<sup>b</sup>Logistic regression models adjusted for Model 1 characteristics and SES (education, income).

<sup>c</sup>Logistic regression models adjusted for Model 2 characteristics and depression status.

FCH, favorable cardiovascular health.
